# Supplementary material for: Patterns and perceptions of vaping among adults living in social housing: a representative survey in Great Britain, 2023
Source: PubMed Central journal article supplement (PMC11414268; doi:10.1186/s12889-024-20043-5), 2024-09-20
Supplement: 12889_2024_20043_MOESM1_ESM.pdf [file 12889_2024_20043_MOESM1_ESM.pdf]

**Table S1.** Current vaping prevalence by housing tenure (*n*=23,245)

|                           | Current vaping, % <sup>1</sup> [95% CI]           |                                                   |
|---------------------------|---------------------------------------------------|---------------------------------------------------|
|                           | Social housing<br>( <i>n</i> <sup>2</sup> =3,161) | Other housing<br>( <i>n</i> <sup>2</sup> =20,084) |
| All adults                | 19.4 [17.7–21.0]                                  | 10.4 [9.9–10.9]                                   |
| Age (years)               |                                                   |                                                   |
| 16-24                     | 24.5 [20.0–29.1]                                  | 23.8 [21.5–26.1]                                  |
| 25-34                     | 22.6 [18.3–26.8]                                  | 16.5 [14.8–18.1]                                  |
| 35-44                     | 25.3 [20.7–30.0]                                  | 11.9 [10.5–13.3]                                  |
| 45-54                     | 19.9 [15.6–24.1]                                  | 8.9 [7.8–10.0]                                    |
| 55-64                     | 18.0 [14.2–21.9]                                  | 6.6 [5.7–7.5]                                     |
| ≥65                       | 6.6 [4.6–8.5]                                     | 2.4 [1.9–2.8]                                     |
| Gender                    |                                                   |                                                   |
| Men                       | 20.3 [17.7–22.9]                                  | 11.1 [10.4–11.9]                                  |
| Women                     | 18.3 [16.2–20.5]                                  | 9.5 [8.8–10.2]                                    |
| Occupational social grade |                                                   |                                                   |
| ABC1 (more advantaged)    | 16.1 [13.9–18.4]                                  | 8.9 [8.4–9.5]                                     |
| C2DE (less advantaged)    | 20.6 [18.5–22.8]                                  | 12.6 [11.6–13.7]                                  |
| Nation                    |                                                   |                                                   |
| England                   | 19.9 [18.1–21.8]                                  | 10.9 [10.3–11.5]                                  |
| Wales                     | 19.0 [13.1–24.9]                                  | 6.6 [5.4–7.8]                                     |
| Scotland                  | 14.1 [11.0–17.2]                                  | 7.5 [6.6–8.5]                                     |
| Smoking status            |                                                   |                                                   |
| Never smoker              | 5.8 [4.2–7.3]                                     | 2.4 [2.0–2.7]                                     |
| Ex-smoker                 | 30.6 [26.9–34.3]                                  | 17.0 [15.7–18.2]                                  |
| Current smoker            | 30.5 [26.9–34.1]                                  | 32.2 [30.1–34.3]                                  |

CI, confidence interval.

<sup>1</sup> Column percentages.<sup>2</sup> Unweighted sample size.

**Table S2.** Vaping characteristics by housing tenure, among current vapers ( $n=1,150$ )

|                               | % <sup>1</sup> [95% CI]         |                                |
|-------------------------------|---------------------------------|--------------------------------|
|                               | Social housing<br>( $n^2=261$ ) | Other housing<br>( $n^2=889$ ) |
| Daily vaping                  | 81.4 [75.5–87.3]                | 79.1 [75.8–82.4]               |
| Main device type used         |                                 |                                |
| Disposable                    | 42.1 [35.1–49.0]                | 40.8 [37.0–44.5]               |
| Refillable                    | 49.3 [42.2–56.3]                | 47.8 [44.0–51.5]               |
| Pod                           | 8.6 [4.8–12.4]                  | 11.4 [9.1–13.7]                |
| Usual nicotine concentration  |                                 |                                |
| No nicotine                   | 14.6 [9.1–20.0]                 | 8.8 [6.7–10.9]                 |
| $\leq 6$ mg/ml                | 29.4 [22.7–36.1]                | 33.8 [30.0–37.5]               |
| 7 to 11 mg/ml                 | 8.6 [4.6–12.5]                  | 10.6 [8.2–13.1]                |
| 12 to 19 mg/ml                | 15.3 [10.3–20.2]                | 15.1 [12.3–17.9]               |
| $\geq 20$ mg/ml               | 32.2 [25.0–39.3]                | 31.7 [28.0–35.5]               |
| Don't know                    | 10.3 [6.3–14.4]                 | 10.2 [8.0–12.4]                |
| Usual source of purchase      |                                 |                                |
| Vape shop                     | 29.9 [23.6–36.3]                | 24.4 [21.2–27.5]               |
| Supermarket/convenience store | 47.1 [40.1–54.1]                | 46.0 [42.3–49.8]               |
| Online                        | 16.7 [11.2–22.3]                | 23.5 [20.3–26.7]               |
| Other                         | 6.2 [2.9–9.6]                   | 6.2 [4.4–7.9]                  |

CI, confidence interval.

<sup>1</sup> Column percentages. There were some missing data ( $n=184$  daily vaping,  $n=26$  main device type used,  $n=23$  usual nicotine concentration,  $n=21$  usual source of purchase); valid percentages are shown.

<sup>2</sup> Unweighted sample size.

Data on vaping characteristics were only collected in certain waves (January, April, June, July, and October); vapers surveyed in other months were not included in these analyses.

**Table S3.** Unadjusted and adjusted associations of housing tenure (social housing and private rented vs. home owner) with vaping characteristics, among current vapers (n=1,127)

|                               | Vaping characteristics        |                            |                               |                            |
|-------------------------------|-------------------------------|----------------------------|-------------------------------|----------------------------|
|                               | Social housing vs. home owner |                            | Private rented vs. home owner |                            |
|                               | OR [95% CI]                   | OR <sub>adj</sub> [95% CI] | OR [95% CI]                   | OR <sub>adj</sub> [95% CI] |
| Daily vaping                  | 1.10 [0.69–1.74]              | 1.24 [0.76–2.02]           | 0.90 [0.59–1.39]              | 1.22 [0.76–1.96]           |
| Main device type used         |                               |                            |                               |                            |
| Disposable                    | 1.23 [0.87–1.73]              | 1.11 [0.76–1.63]           | 1.59 [1.13–2.22]              | 1.08 [0.73–1.60]           |
| Refillable                    | 0.99 [0.71–1.39]              | 1.13 [0.78–1.65]           | 0.81 [0.58–1.13]              | 1.20 [0.81–1.77]           |
| Pod                           | 0.61 [0.35–1.05]              | 0.61 [0.35–1.09]           | 0.52 [0.30–0.92]              | 0.55 [0.30–0.99]           |
| Usual nicotine concentration  | 0.92 [0.65–1.29]              | 0.81 [0.56–1.16]           | 1.04 [0.76–1.42]              | 0.79 [0.56–1.12]           |
| Usual source of purchase      |                               |                            |                               |                            |
| Vape shop                     | 1.23 [0.86–1.78]              | 1.17 [0.79–1.72]           | 0.85 [0.58–1.26]              | 0.88 [0.59–1.33]           |
| Supermarket/convenience store | 1.17 [0.84–1.63]              | 1.16 [0.81–1.67]           | 1.33 [0.96–1.86]              | 1.13 [0.79–1.61]           |
| Online                        | 0.62 [0.39–0.97]              | 0.65 [0.41–1.04]           | 0.86 [0.58–1.28]              | 1.06 [0.69–1.64]           |
| Other                         | 0.96 [0.49–1.87]              | 1.00 [0.52–1.93]           | 0.74 [0.36–1.55]              | 0.77 [0.37–1.60]           |

CI, confidence interval. OR, odds ratio. OR<sub>adj</sub>, odds ratio adjusted for age, gender, occupational social grade, country, and smoking status.

There were some missing data on each outcome (daily vaping  $n=180$ , main device type  $n=26$ , nicotine concentration  $n=144$ , source of purchase  $n=20$ ). There were also some missing data on gender ( $n=28$ ), so the sample sizes for the adjusted models were slightly smaller.

**Table S4.** Unadjusted and adjusted associations of housing tenure with harm perceptions of vaping products relative to cigarettes, among current smokers ( $n=3,390$ )

|                          | % <sup>1</sup> [95% CI] |                  |
|--------------------------|-------------------------|------------------|
|                          | Social housing          | Other housing    |
| <b>All smokers</b>       |                         |                  |
| Unweighted <i>N</i>      | 867                     | 2,523            |
| Less harmful             | 17.6 [14.6–20.6]        | 25.8 [23.8–27.7] |
| Equally harmful          | 34.2 [30.6–37.7]        | 36.6 [34.5–38.8] |
| More harmful             | 31.6 [28.1–35.2]        | 21.8 [19.9–23.6] |
| Don't know               | 16.6 [13.8–19.4]        | 15.8 [14.3–17.4] |
| <b>Exclusive smokers</b> |                         |                  |
| Unweighted <i>N</i>      | 625                     | 1,762            |
| Less harmful             | 10.5 [7.8–13.2]         | 18.4 [16.4–20.4] |
| Equally harmful          | 33.3 [29.1–37.5]        | 36.8 [34.3–39.4] |
| More harmful             | 39.3 [34.8–43.7]        | 25.4 [23.1–27.8] |
| Don't know               | 16.9 [13.6–20.2]        | 19.3 [17.3–21.4] |
| <b>Dual users</b>        |                         |                  |
| Unweighted <i>N</i>      | 242                     | 761              |
| Less harmful             | 33.8 [26.9–40.7]        | 41.3 [37.3–45.3] |
| Equally harmful          | 36.1 [29.3–42.9]        | 36.1 [32.2–40.1] |
| More harmful             | 14.2 [9.3–19.1]         | 14.1 [11.2–17.0] |
| Don't know               | 15.9 [10.5–21.3]        | 8.5 [6.3–10.6]   |

CI, confidence interval.

<sup>1</sup> Column percentages.

**Table S5.** Unadjusted and adjusted associations of housing tenure with harm perceptions of vaping products relative to cigarettes, among current smokers

|                              | Harm perceptions of e-cigarettes vs. cigarettes |                            |                                  |                            |
|------------------------------|-------------------------------------------------|----------------------------|----------------------------------|----------------------------|
|                              | Social housing<br>vs. home owner                |                            | Private rented<br>vs. home owner |                            |
|                              | OR [95% CI]                                     | OR <sub>adj</sub> [95% CI] | OR [95% CI]                      | OR <sub>adj</sub> [95% CI] |
| <b>All smokers (n=3,294)</b> |                                                 |                            |                                  |                            |
| Less harmful                 | 0.58 [0.46–0.74]                                | 0.65 [0.50–0.84]           | 0.87 [0.70–1.08]                 | 0.87 [0.68–1.12]           |
| Equally harmful              | 0.88 [0.73–1.07]                                | 0.86 [0.69–1.06]           | 0.95 [0.78–1.17]                 | 0.97 [0.78–1.20]           |
| More harmful                 | 1.87 [1.51–2.32]                                | 1.69 [1.35–2.13]           | 1.41 [1.12–1.77]                 | 1.19 [0.92–1.53]           |
| Don't know                   | 1.02 [0.79–1.30]                                | 1.02 [0.78–1.32]           | 0.84 [0.65–1.10]                 | 1.03 [0.77–1.38]           |

CI, confidence interval. OR, odds ratio. OR<sub>adj</sub>, odds ratio adjusted for age, gender, occupational social grade, country, and vaping status.

There were some missing data on covariates (age  $n=1$ , gender  $n=68$ ), so sample sizes for adjusted models were slightly smaller.
